# Supplementary material for: Evidence of Histoplasma capsulatum seropositivity and exploration of risk factors for exposure in Busia county, western Kenya: Analysis of the PAZ dataset
Source: PubMed Central journal article supplement (PMC10180684; doi:10.1371/journal.pntd.0011295), 2023-05-12

# PLOS Neglected Tropical Diseases

## Evidence of *Histoplasma capsulatum* seropositivity and exploration of risk factors for exposure in Busia county, western Kenya: Analysis of the PAZ dataset --Manuscript Draft--

|                                                                                                                                                                                                             |                                                                                                                                                                                                                                                                                                                                                                                                                                                                                                                                                                                                                                                                                                                                                                                                                                                                                                                                                                                                                                                                                                                                                                                                                                                                                                                                                                                                                                                                                                                                                                                                                                                                                                                                                                                                                                                                                                                                                                                                                                                                                                                                                                                                                                                                                                     |
|-------------------------------------------------------------------------------------------------------------------------------------------------------------------------------------------------------------|-----------------------------------------------------------------------------------------------------------------------------------------------------------------------------------------------------------------------------------------------------------------------------------------------------------------------------------------------------------------------------------------------------------------------------------------------------------------------------------------------------------------------------------------------------------------------------------------------------------------------------------------------------------------------------------------------------------------------------------------------------------------------------------------------------------------------------------------------------------------------------------------------------------------------------------------------------------------------------------------------------------------------------------------------------------------------------------------------------------------------------------------------------------------------------------------------------------------------------------------------------------------------------------------------------------------------------------------------------------------------------------------------------------------------------------------------------------------------------------------------------------------------------------------------------------------------------------------------------------------------------------------------------------------------------------------------------------------------------------------------------------------------------------------------------------------------------------------------------------------------------------------------------------------------------------------------------------------------------------------------------------------------------------------------------------------------------------------------------------------------------------------------------------------------------------------------------------------------------------------------------------------------------------------------------|
| <b>Manuscript Number:</b>                                                                                                                                                                                   | PNTD-D-23-00017                                                                                                                                                                                                                                                                                                                                                                                                                                                                                                                                                                                                                                                                                                                                                                                                                                                                                                                                                                                                                                                                                                                                                                                                                                                                                                                                                                                                                                                                                                                                                                                                                                                                                                                                                                                                                                                                                                                                                                                                                                                                                                                                                                                                                                                                                     |
| <b>Full Title:</b>                                                                                                                                                                                          | Evidence of <i>Histoplasma capsulatum</i> seropositivity and exploration of risk factors for exposure in Busia county, western Kenya: Analysis of the PAZ dataset                                                                                                                                                                                                                                                                                                                                                                                                                                                                                                                                                                                                                                                                                                                                                                                                                                                                                                                                                                                                                                                                                                                                                                                                                                                                                                                                                                                                                                                                                                                                                                                                                                                                                                                                                                                                                                                                                                                                                                                                                                                                                                                                   |
| <b>Short Title:</b>                                                                                                                                                                                         | <i>Histoplasma capsulatum</i> seroprevalence and risk factors in western Kenya                                                                                                                                                                                                                                                                                                                                                                                                                                                                                                                                                                                                                                                                                                                                                                                                                                                                                                                                                                                                                                                                                                                                                                                                                                                                                                                                                                                                                                                                                                                                                                                                                                                                                                                                                                                                                                                                                                                                                                                                                                                                                                                                                                                                                      |
| <b>Article Type:</b>                                                                                                                                                                                        | Research Article                                                                                                                                                                                                                                                                                                                                                                                                                                                                                                                                                                                                                                                                                                                                                                                                                                                                                                                                                                                                                                                                                                                                                                                                                                                                                                                                                                                                                                                                                                                                                                                                                                                                                                                                                                                                                                                                                                                                                                                                                                                                                                                                                                                                                                                                                    |
| <b>Keywords:</b>                                                                                                                                                                                            | <i>Histoplasma capsulatum</i> ; seroprevalence; Kenya; human-animal-environment interface                                                                                                                                                                                                                                                                                                                                                                                                                                                                                                                                                                                                                                                                                                                                                                                                                                                                                                                                                                                                                                                                                                                                                                                                                                                                                                                                                                                                                                                                                                                                                                                                                                                                                                                                                                                                                                                                                                                                                                                                                                                                                                                                                                                                           |
| <b>Abstract:</b>                                                                                                                                                                                            | <p><b>Background</b><br/>Despite recognition of histoplasmosis as a disease of national public health concern in Kenya, the burden of <i>Histoplasma capsulatum</i> in the general population remains unknown. This study examined the human seroprevalence of anti-<i>Histoplasma</i> antibody, and explored associations between seropositivity, and demographic and environmental variables, in Busia county, western Kenya.</p> <p><b>Methodology</b><br/>Biobanked serum samples and associated metadata, from a previous cross-sectional survey, were examined. Latex agglutination tests to detect the presence of anti-<i>Histoplasma</i> antibody were performed on serum samples from 670 survey respondents, representing 178 households within 102 sub-locations. Potential epidemiologic risk factors for <i>H. capsulatum</i> exposure were explored using multi-level multivariable logistic regression analysis with household and sub-location included as random effects.</p> <p><b>Principal findings</b><br/>The apparent sample seroprevalence of anti-<i>Histoplasma</i> antibody was 15.5% (n=104/670, 95% Confidence Interval (CI) 12.9-18.5%). A multivariable logistic regression model identified increased odds of <i>H. capsulatum</i> seropositivity in respondents reporting rats within the household within the previous 12 months (OR=3.03 95% CI 1.06-8.67, p=0.04). Compared to respondents aged 25-34 years, the odds of seropositivity were higher in respondents aged 15-24 years (OR=2.66 95% CI 1.03-6.89, p=0.04) or ≥45 years (OR=2.64 95% CI 0.99-7.01, p=0.05).</p> <p><b>Conclusions</b><br/>The seroprevalence result provides a baseline for sample size approximations for future epidemiologic studies of the burden of <i>H. capsulatum</i> exposure in Busia county. The final model explored theoretically plausible risk factors for <i>H. capsulatum</i> exposure in the region. A number of factors may contribute to the complex epidemiological picture impacting <i>H. capsulatum</i> exposure status at the human-animal-environment interface in western Kenya. Focussed <i>H. capsulatum</i> research is warranted to determine the contextual significance of identified associations, and in representative sample populations.</p> |
| <b>Additional Information:</b>                                                                                                                                                                              |                                                                                                                                                                                                                                                                                                                                                                                                                                                                                                                                                                                                                                                                                                                                                                                                                                                                                                                                                                                                                                                                                                                                                                                                                                                                                                                                                                                                                                                                                                                                                                                                                                                                                                                                                                                                                                                                                                                                                                                                                                                                                                                                                                                                                                                                                                     |
| <b>Question</b>                                                                                                                                                                                             | <b>Response</b>                                                                                                                                                                                                                                                                                                                                                                                                                                                                                                                                                                                                                                                                                                                                                                                                                                                                                                                                                                                                                                                                                                                                                                                                                                                                                                                                                                                                                                                                                                                                                                                                                                                                                                                                                                                                                                                                                                                                                                                                                                                                                                                                                                                                                                                                                     |
| <p><b>Government Employee</b></p> <p>Are you or any of the contributing authors an employee of the United States government?</p> <p>Manuscripts authored by one or more US Government employees are not</p> | No - No authors are employees of the U.S. government.                                                                                                                                                                                                                                                                                                                                                                                                                                                                                                                                                                                                                                                                                                                                                                                                                                                                                                                                                                                                                                                                                                                                                                                                                                                                                                                                                                                                                                                                                                                                                                                                                                                                                                                                                                                                                                                                                                                                                                                                                                                                                                                                                                                                                                               |

|                                                                                                                                                                                                                                                                                                                                                                                                                                                                                                 |                                                                                                                                                                                                                                                                                                                                                                                                                                                                                                                                                                                                                                                                                                                 |
|-------------------------------------------------------------------------------------------------------------------------------------------------------------------------------------------------------------------------------------------------------------------------------------------------------------------------------------------------------------------------------------------------------------------------------------------------------------------------------------------------|-----------------------------------------------------------------------------------------------------------------------------------------------------------------------------------------------------------------------------------------------------------------------------------------------------------------------------------------------------------------------------------------------------------------------------------------------------------------------------------------------------------------------------------------------------------------------------------------------------------------------------------------------------------------------------------------------------------------|
| <p>copyrighted, but are licensed under a <a href="#">CC0 Public Domain Dedication</a>, which allows unlimited distribution and reuse of the article for any lawful purpose. This is a legal requirement for US Government employees.</p> <p>This will be typeset if the manuscript is accepted for publication.</p>                                                                                                                                                                             |                                                                                                                                                                                                                                                                                                                                                                                                                                                                                                                                                                                                                                                                                                                 |
| <p><b>Financial Disclosure</b></p> <p>Enter a financial disclosure statement that describes the sources of funding for the work included in this submission and the role the funder(s) played. This includes grants and any commercial funding of the work or authors.</p> <p>This statement will be typeset if the manuscript is accepted for publication.</p> <p>Review the <a href="#">submission guidelines</a> and the instructions link below for detailed requirements and guidance.</p> | <p>The original samples described were collected with the support of the Wellcome Trust (085308) and the Medical Research Council award. This work received support from the CGIAR Research Program on Agriculture for Nutrition and Health (A4NH), led by the International Food Policy Research Institute (IFPRI). Laboratory processing and analyses presented here were supported by funds from Scantlebury Wellcome Trust ISSF Fellowship award. The funders had no role in this study design, analysis, manuscript preparation or decision to publish. We also acknowledge the CGIAR Fund Donors (<a href="http://www.cgiar.org/about-us/our-funders">http://www.cgiar.org/about-us/our-funders</a>).</p> |
| <p><b>Competing Interests</b></p> <p>On behalf of all authors, disclose any competing interests that could be perceived to bias this work.</p> <p>This statement will be typeset if the manuscript is accepted for publication.</p> <p>Review the instructions link below and PLOS NTDs' <a href="#">competing interests</a> policy to determine what information must be disclosed at submission.</p>                                                                                          | <p>There are no competing interests to declare.</p>                                                                                                                                                                                                                                                                                                                                                                                                                                                                                                                                                                                                                                                             |
| <p><b>Data Availability</b></p> <p>Provide a <b>Data Availability Statement</b> in the box below. This statement should detail where the data used in this submission can be accessed. This</p>                                                                                                                                                                                                                                                                                                 | <p>The original dataset, and the serology results, are available via an open access repository held by the University of Liverpool (<a href="http://dx.doi.org/10.17638/datacat.liverpool.ac.uk/352">http://dx.doi.org/10.17638/datacat.liverpool.ac.uk/352</a>).</p>                                                                                                                                                                                                                                                                                                                                                                                                                                           |

statement will be typeset if the manuscript is accepted for publication.

Before publication, authors are required to make all data underlying their findings fully available, without restriction. Review our [PLOS Data Policy](#) page for detailed information on this policy. Instructions for writing your Data Availability statement can be accessed via the Instructions link below.

1 **Full title**

2 **Evidence of *Histoplasma capsulatum* seropositivity and exploration of risk factors for**  
3 **exposure in Busia county, western Kenya: Analysis of the PAZ dataset**

4

5 **Short title**

6 *Histoplasma capsulatum* seroprevalence and risk factors in western Kenya

7

8 **Author names and affiliations**

9 Tessa Rose Cornell<sup>1\*</sup>, Lian Francesca Thomas<sup>1,2</sup>, Elizabeth Anne Jessie Cook<sup>2</sup>, Gina Pinchbeck<sup>1</sup>,  
10 Judy Bettridge<sup>1,2,#a,#b</sup>, Lauren Gordon<sup>1,#c</sup>, Velma Kivali<sup>2</sup>, Alice Kiyong'a<sup>2</sup>, Eric Maurice Fèvre<sup>1,2</sup>, Claire  
11 Elizabeth Scantlebury<sup>1</sup>

12

13 <sup>1</sup>Institute of Infection, Veterinary and Ecological Sciences (IVES), University of Liverpool, UK

14 <sup>2</sup>International Livestock Research Institute (ILRI), Nairobi, Kenya

15 <sup>#a</sup>Current address: Natural Resources Institute, University of Greenwich, UK

16 <sup>#b</sup>Current address: Bristol Veterinary School, University of Bristol, UK

17 <sup>#c</sup>Current address: Cellmark Forensic Services, UK

18

19 \*Corresponding author

20 Email: [Tessa.Cornell@liverpool.ac.uk](mailto:Tessa.Cornell@liverpool.ac.uk) (TC)

21

22

23

24 **Abstract**

25 **Background**

26 Despite recognition of histoplasmosis as a disease of national public health concern in Kenya, the  
27 burden of *Histoplasma capsulatum* in the general population remains unknown. This study examined  
28 the human seroprevalence of anti-*Histoplasma* antibody, and explored associations between  
29 seropositivity, and demographic and environmental variables, in Busia county, western Kenya.

30 **Methodology**

31 Biobanked serum samples and associated metadata, from a previous cross-sectional survey, were  
32 examined. Latex agglutination tests to detect the presence of anti-*Histoplasma* antibody were  
33 performed on serum samples from 670 survey respondents, representing 178 households within 102  
34 sub-locations.

35 Potential epidemiologic risk factors for *H. capsulatum* exposure were explored using multi-level  
36 multivariable logistic regression analysis with household and sub-location included as random effects.

37 **Principal findings**

38 The apparent sample seroprevalence of anti-*Histoplasma* antibody was 15.5% ( $n=104/670$ , 95%  
39 Confidence Interval (CI) 12.9-18.5%). A multivariable logistic regression model identified increased  
40 odds of *H. capsulatum* seropositivity in respondents reporting rats within the household within the  
41 previous 12 months (OR=3.03 95% CI 1.06-8.67,  $p=0.04$ ). Compared to respondents aged 25-34  
42 years, the odds of seropositivity were higher in respondents aged 15-24 years (OR=2.66 95% CI  
43 1.03-6.89,  $p=0.04$ ) or  $\geq 45$  years (OR=2.64 95% CI 0.99-7.01,  $p=0.05$ ).

44 **Conclusions**

45 The seroprevalence result provides a baseline for sample size approximations for future  
46 epidemiologic studies of the burden of *H. capsulatum* exposure in Busia county. The final model  
47 explored theoretically plausible risk factors for *H. capsulatum* exposure in the region. A number of  
48 factors may contribute to the complex epidemiological picture impacting *H. capsulatum* exposure  
49 status at the human-animal-environment interface in western Kenya. Focussed *H. capsulatum*  
50 research is warranted to determine the contextual significance of identified associations, and in  
51 representative sample populations.

## 52 **Author Summary**

53 Despite recognition of histoplasmosis as a priority disease of public health concern in Kenya, and an  
54 important AIDS-defining illness, there remains a paucity of research on this neglected fungal disease.  
55 Clinical and laboratory capacity for the diagnosis and treatment of histoplasmosis across Kenya is  
56 limited or unknown, and existing diagnostic and therapeutic techniques can be cost-prohibitive. In  
57 addition, the fragmentary nature of histoplasmosis research groups worldwide, and the under- or  
58 over-representation of specific sociodemographic groups and geographic regions in outbreak reports  
59 and hospital-based case series, have been acknowledged.

60 This study provides a first look at *Histoplasma capsulatum* seroprevalence in rural western Kenya,  
61 and explores risk factors for exposure at this human-animal-environment interface. More broadly,  
62 these outcomes will help to quantify the burden of *H. capsulatum* in household and community  
63 environments, which may direct further research efforts, and inform policy-makers on the prioritisation  
64 for clinical services and public health efforts with regards to histoplasmosis.

## 65 **Introduction**

66 The burden of *Histoplasma capsulatum* is sparsely documented in sub-Saharan Africa, including in  
67 Kenya where histoplasmosis has been recognised as a priority disease of national public health  
68 concern [1,2]. Histoplasmin skin sensitivity surveys conducted in a limited number of countries in sub-  
69 Saharan Africa, have recorded test positivity rates between 0.0 and 35.0%, in populations with  
70 variable demographic and clinical characteristics [3–11]. These findings indicate that *H. capsulatum* is  
71 present within this geographic region. However, further research is warranted to explore the factors  
72 contributing to varying prevalence between different geographic areas and environments, the risk  
73 factors for exposure and infection, and the incidence and clinical outcomes of histoplasmosis.

74 The limited research in this area is confounded by multiple barriers to the identification and  
75 management of human histoplasmosis, which comprise: (i) case under-reporting; (ii) case mis-  
76 diagnosis; (iii) limited access to clinical facilities for case diagnosis or treatment; (iv) limited access to  
77 anti-fungal treatments; (v) cost-prohibitive diagnostic or treatment methods; and (vi) poor definition of  
78 transmission routes and risk factors for exposure [12–15]. These barriers present a significant  
79 challenge to histoplasmosis surveillance, treatment and infection control, and thus limit our  
80 understanding of how *H. capsulatum* exposure or infection impacts the Kenyan population.

81 A number of risk factors for histoplasmosis are widely acknowledged, however evidence of contextual  
82 factors relevant to sub-Saharan Africa remains limited. Disseminated histoplasmosis has been  
83 identified as a major AIDS-defining disease presentation of HIV-infected patients [16]. In contrast to  
84 disease course in immunocompetent hosts, which is typically characterised as asymptomatic and self-  
85 limiting [17], patients with *H. capsulatum* and HIV co-infection have demonstrated significant morbidity  
86 and mortality rates in the absence of appropriate treatment [18,19].

87 Occupational and recreational activities speculated to increase risk of aerosolisation and inhalation of  
88 infective *H. capsulatum* microconidia, have been described in histoplasmosis case and outbreak  
89 reports, and hospital-based case series. Tunnel work [20], land excavation [21], bat habitat exposure  
90 during cave and tunnel visits [22,23], and exposure to bird faeces and roosts [24,25], have been  
91 reported as plausible risk factors for *H. capsulatum* exposure. *H. capsulatum* has been identified in  
92 soil and water samples [26–28], and in bats [29], and bat and bird faeces [30–34], by direct  
93 microscopy, mouse inoculation and culture technique, or molecular detection. In the rural Kenyan  
94 context, humans can live in close proximity with domestic and wild animals, and previously  
95 recognised reservoirs of *Histoplasma* could be present within household environments.

96 The current study utilised serum samples and metadata previously collected during a cross-sectional  
97 household survey in Busia county, western Kenya [35] to explore levels of exposure to *H. capsulatum*.

98 The primary objectives of the study were as follows:

- 99 • Estimate the human seroprevalence of anti-*Histoplasma* antibody in Busia county, using a latex  
100 agglutination test (LAT);
- 101 • Explore associations between *H. capsulatum* seropositivity, and demographic and  
102 environmental variables in Busia county; and
- 103 • Identify limitations in current metadata with regards to identifying the burden of *H. capsulatum*  
104 exposure in the Kenyan context, and thus highlight future research activities required to address  
105 gaps in evidence.

## 106 **Methods**

### 107 **Original study and ethical approval**

108 A cross-sectional household survey was conducted from 2010-12 in Busia county, western Kenya, for  
109 the People, Animals and their Zoonoses (PAZ) project, supported by the Wellcome Trust [36]. Project

110 outputs included epidemiologic data on the prevalence of neglected zoonotic diseases amongst 2113  
 111 survey respondents, from randomly selected households stratified by sub-location ( $n=143$ ) [35,37].  
 112 For complete methodology of household selection, refer to Fèvre *et al.* (2017) [35].

113 **Ethical** approval for serum sample collection and storage for future processing, was granted by the  
 114 Kenya Medical Research Institute (KEMRI; SSC 1701). Permission to re-analyse metadata and test  
 115 bio-banked serum samples was provided by KEMRI, and supported by Scantlebury Wellcome Trust  
 116 ISSF Fellowship.

117 **Serum sample selection**

118 Survey respondents were selected from a sub-set of the PAZ dataset, representing **respondents** with  
 119 available data on bat observation (dataset recording bat observation:  $n=670/942$ , 71.1%; original  
 120 dataset:  $n=670/2113$ , 31.7%). The data sub-set was collected between May 2011 and July 2012.

121 **Serum samples were selected to include survey respondents reporting variable HIV status at the time**  
 122 **of sampling (positive:  $n=48/670$ , 7.2%),** and absence or presence of bats around the home during the  
 123 12 months prior to survey delivery (bats observed:  $n=348/670$ , 51.9%) (Table 1). All respondents with  
 124 a HIV positive status and all those reporting the presence of bats were selected, in addition to  
 125 systematically selecting every eighth respondent across the dataset. The selected sub-set of survey  
 126 respondents represented 178 households within 102 sub-locations.

127 **A positive HIV status was recorded in 7.2% ( $n=48/670$ ) of respondents,** with the highest prevalence of  
 128 HIV positive status among respondents aged 35-44 years ( $n=18/670$ , 23.7%), and females (Female:  
 129  $n=33/350$ , 9.4%; Male:  $n=15/320$ , 4.7%).

130

131 **Table 1. Selection of study respondents ( $n=670/942$ , 71.1%) from the household survey (Fèvre *et al.*, 2017),**  
 132 **characterised by HIV status (Positive/ Negative), and bat observation around the home in previous 12 months (Yes/**  
 133 **No).**

|            |          | Bats observed around home in previous 12 months |     | Total |
|------------|----------|-------------------------------------------------|-----|-------|
|            |          | No*                                             | Yes |       |
| HIV result | Negative | 292                                             | 330 | 622   |
|            | Positive | 30                                              | 18  | 48    |
| Total      |          | 322                                             | 348 | 670   |

134 \* No ( $n=321$ ) or **not answered ( $n=1$ )**



135

### 136 **Serological testing**

137 One IMMY® Latex Agglutination *Histoplasma* test was performed as per manufacturer guidelines for  
138 each thawed, heat-treated serum sample. In accordance with IMMY® guidelines, a graduated scale of  
139 reaction strengths was used to assign test results from negative (-) to four plus (4+). Positive and  
140 negative controls had to demonstrate 2+ or greater, and less than 1+ reaction strengths, respectively  
141 [38]. **Samples assigned a 2+ or greater reaction strength were considered to be presumptive evidence**

**142 of active or recent *H. capsulatum* infection [38].**

143 The LAT provides a measure of agglutinating anti-*Histoplasma* antibody, predominant during the early  
144 IgM antibody response. Antibody responses in individuals with acute histoplasmosis have been  
145 characterised by an initial peak in IgM mean concentration at 14 to 27 days, before returning to pre-  
146 clinical levels by one year [39]. Thus, a positive reaction may be indicative of exposure or infection up  
147 to six months prior.

### 148 **Seroprevalence estimation**

149 The apparent prevalence of *H. capsulatum* seropositivity in the sample population was determined  
150 based on the IMMY® Latex Agglutination *Histoplasma* test results. True seroprevalence was  
151 estimated using published sensitivity and specificity values for a histoplasmin sensitised LAT, of 62%  
152 and 97%, respectively [40]. Epitools interface and Clopper-Pearson (exact) test were employed to  
153 determine 95% Confidence Intervals (CIs) (<https://epitools.ausvet.com.au/trueprevalence> [41]).

### 154 **Statistical analysis**

155 Household survey metadata, and LAT results, were stored in a protected Microsoft® Excel file.  
156 Metadata variables were selected for analysis if identified as either, an established risk factor for *H.*  
157 *capsulatum* exposure in current literature, or a theoretically plausible risk factor for exposure based on  
158 current evidence of *H. capsulatum* life cycle and transmission dynamics (Tables S1-S2).

159 Descriptive statistics were used to analyse respondent- and household level-characteristics of the  
160 selected sub-set of respondents, and to compare this sub-set with the original sampled population.  
161 The Mann-Whitney U test was applied to compare distributions of categorical variables between the  
162 original sample and the sub-set, and to determine the statistical significance of differences.

163 **Univariable** associations between *H. capsulatum* seropositivity, and individual selected variables,  
164 were examined using **Pearson Chi-squared test ( $\chi^2$ ), Odds Ratios (ORs)** with 95% CIs, and  
165 associated *p*-values, were calculated.

166 **Phi coefficient** was employed to analyse suspected correlations between categorical variables. A  
167 coefficient value of >0.5, with an associated *p*-value <0.05, was interpreted as evidence of a  
168 **correlation** between variables. Identification of a correlation, and subsequent comparison of *p* values  
169 on univariable analysis, supported exclusion of variables from further analysis, **where** those with  
170 stronger *p*-values were retained for further analysis.

171 Variables with a  $\chi^2$ -associated *p*-value <0.20 on univariable analysis were selected for testing in a  
172 multivariable logistic regression model with seropositivity as the binary outcome. The **model** was built  
173 using a manual backwards-stepwise approach. As the study is exploratory, and designed to generate  
174 hypotheses about potential risk factors for *H. capsulatum* exposure, a conservative cut-off value of  
175 *p*<0.10 was applied to include variables in the final model. Final versions of the model were assessed  
176 using the Hosmer Lemeshow test statistic, and Delta Betas were explored for variables within the final  
177 model to examine the effect of any influential data points. Random effects were included to explore  
178 the effect of clustering of respondents at both household, and sub-location levels. Regression  
179 coefficients, estimate *p*-values, and z-ratios were compared between single and multi-level models.  
180 Proportion of variance attributed to individual levels was calculated using the latent-variable approach  
181 described by Goldstein *et al.* (2002) [42].

182 Statistical analyses, and multi-level modelling, were performed using IBM® SPSS® Statistics 25, and  
183 MLwiN 3.05 software, respectively.

## 184 **Results**

### 185 **Study population**

186 Selected respondents (*n*=670/942, 71.1%) represented 178 households, with a median number of  
187 occupants of 7.0 per household (range: 1-30). The sample comprised respondents aged 5 to >85  
188 years, and displayed a positively skewed age distribution (Fig. S1). Modal and median age categories  
189 were 5-14 years (*n*=272/670, 40.6%), and 15-24 years (*n*=133/670, 19.9%), respectively. The sample  
190 comprised 350 females (52.2%). The gender ratio per age category was approximately 90-125  
191 females per 100 males, with the exception of age category 25-34 years which demonstrated a greater

192 gender gap of 213 females per 100 males. The majority of respondents were teachers or students  
193 ( $n=341/670$ , 50.9%), or within animal management or contact roles ( $n=244/670$ , 36.4%). A minority of  
194 respondents reported smoking behaviour ( $n=17/670$ , 2.5%) (Tables S3-S4).

195 Contact with dogs ( $n=582/670$ , 86.9%), cats ( $n=563/670$ , 84.0%), and poultry ( $n=597/670$ , 89.1%),  
196 and observation of rats ( $n=609/670$ , 90.9%), in and around the household environment, were reported  
197 by the majority of respondents. Examination of indirect animal contact activities, demonstrated that  
198 the majority of respondents were involved in manure preparation ( $n=436/670$ , 65.1%), in contrast to  
199 animal burial and skinning activities which were not frequently reported (Table S4). The most common  
200 manure preparation activities were described as, preparation for fuel, and use as a building material.

201 At a household level ( $n=178$  households), spring water (wet:  $n=93/178$ , 52.2%; dry:  $n=92/178$ , 51.7%)  
202 and borehole sources (wet:  $n=73/178$ , 41.0%; dry:  $n=74/178$ , 41.6%) were most frequently reported in  
203 the previous wet and dry seasons. Houses within the study area tended to be constructed of: iron  
204 ( $n=128/178$ , 71.9%) or thatch ( $n=121/178$ , 68.0%) roofs; mud walls ( $n=160/178$ , 89.9%); and earth  
205 floors ( $n=156/178$ , 87.6%). The majority of households reported using firewood as the main cooking  
206 fuel ( $n=136/178$ , 76.4%) (Table S4).

207 No statistically significant differences were found in the demographic and behavioural variables  
208 between the original sample and the sub-set of respondents selected for this study, with the exception  
209 of observation of bats around the home which was significantly higher in the sub-set ( $p<0.001$ ) due to  
210 the selection criteria applied for sub-setting (Table S5). We therefore consider the sub-set selected for  
211 this study to be appropriately representative of the underlying population, enabling population  
212 inferences to be made with regards to seroprevalence and risk factors being explored.

### 213 **Seroprevalence results**

214 A total of 104 serum samples were interpreted as positive on LAT (a reaction strength of 2+ or  
215 greater), of which the majority displayed a reaction strength of 2+ ( $n=68/104$ , 65.4%) (Table S6 and  
216 Fig. S2). This related to an apparent seroprevalence of 15.5% ( $n=104/670$ , 95% CI 12.9-18.5%). The  
217 estimated true seroprevalence in this sample, adjusting for published LAT sensitivity and specificity  
218 results [40], was calculated as 21.2% (95% CI 16.8-26.2%) [41].

219 43.3% of households ( $n=77/178$ ) contained at least one occupant with a seropositive result. Of these  
220 households, the percentage of occupants demonstrating seropositivity ranged from 7.7% ( $n=1/13$   
221 occupants) to 100.0% ( $n=1/1$  to  $3/3$  occupants) (Fig. 1).

222

223 **Figure 1. Study area in Busia county, western Kenya, and household locations ( $n=178$ ) within 102 sub-**  
224 **locations. Key: red = households with  $\geq 1$  occupant seropositive for *H. capsulatum*; blue = households**  
225 **with zero seropositive occupants. Maps generated using QGIS 3.12.2.**

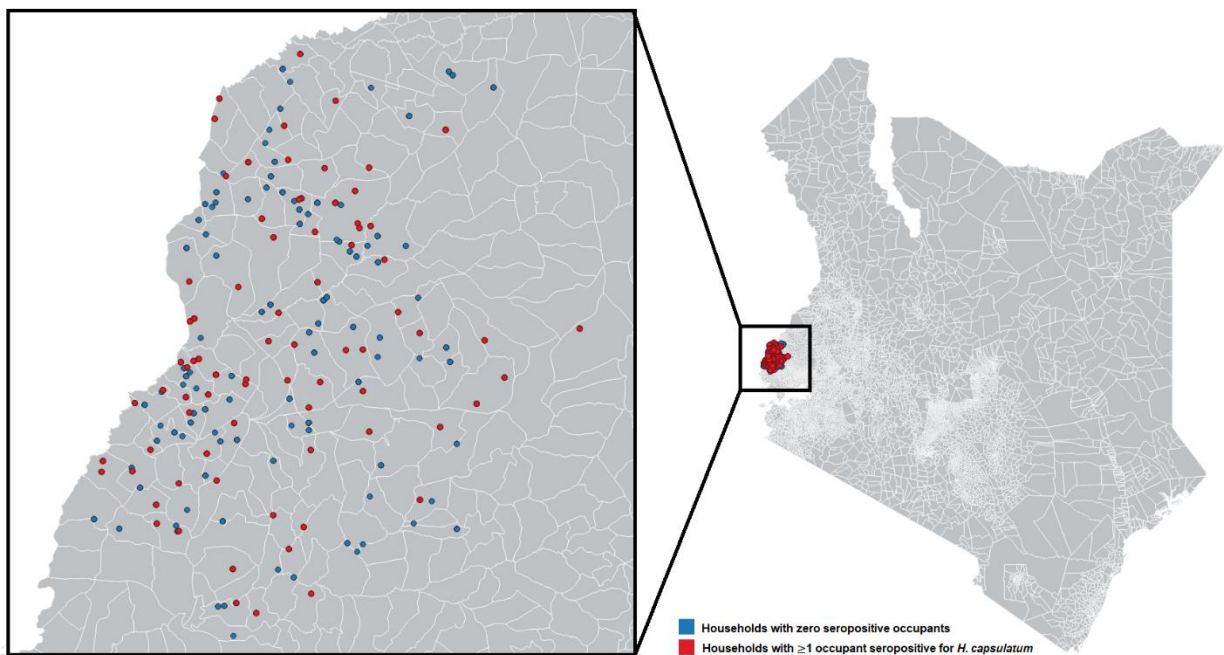

226

227

## 228 Univariable analysis

229 Univariable logistic regression analysis identified a statistically significant association ( $p<0.05$ )  
230 between LAT result and two variables; observation of rats around the home in the previous 12 months  
231 (OR=2.80 95% CI 0.99-7.89,  $p=0.05$ ); and age category 15-24 years (OR=2.80 95% CI 1.10-7.15,  
232  $p=0.03$ ; reference category 25-34 years). Variables which met the multivariable model inclusion  
233 criteria at a higher  $p$ -value cut-off ( $p<0.1$ ) were as follows; observation of bats in the previous 12  
234 months (OR=1.37 95% CI 0.90-2.10,  $p=0.14$ ), household constructed of mud walls (OR=2.26 95% CI  
235 0.80-6.43,  $p=0.13$ ), use of spring water in the previous dry season (OR=1.47 95% CI 0.95-2.28,

236  $p=0.08$ ), and age category  $\geq 45$  years (OR=2.41 95% CI 0.92-6.28,  $p=0.07$ ; reference category 25-34  
 237 years) (Table S4).

238 For each water source variable, a statistically significant correlation ( $\phi > 0.5$ ,  $p < 0.05$ ) was measured  
 239 between reporting the use of the water source in the last wet season, and reporting use of the same  
 240 water source in the last dry season. Thus, only water source variables for the last dry season,  
 241 specifically tap, spring, well, river and borehole sources, were included in further analyses, and the  
 242 seasonal element of the variable was excluded. Findings from univariable logistic regression analysis  
 243 are available in Table S4.

244 **Multivariable logistic regression analysis**

245 The final multi-level multivariable model contains two statistically significant main effects; observation  
 246 of rats around the home in previous 12 months (OR=3.03 95% CI 1.06-8.67,  $p=0.04$ ), and age  
 247 categories 15-24 (OR=2.66 95% CI 1.03-6.89,  $p=0.04$ ; reference category 25-34 years) and  $\geq 45$   
 248 years (OR=2.64 95% CI 0.99-7.01,  $p=0.05$ ), as variables associated with presence of anti-  
 249 *Histoplasma* antibody (Table 2). The final model also included variables which met the inclusion  
 250 criteria at a  $p$ -value cut-off of  $< 0.1$ , as follows; bats observed around the home in the previous 12  
 251 months (OR=1.39 95% CI 0.89-2.16,  $p=0.14$ ); and mud walls in the household (OR=2.67 95% CI  
 252 0.90-7.91,  $p=0.08$ ) (Table 2).

253

254 **Table 2.** Multivariable logistic regression analysis examining variable associations with *H. capsulatum* seropositivity  
 255 based on LAT results, amongst survey respondents ( $n=670/942$ , 71.1%) in Busia county, western Kenya. Odds Ratios  
 256 (OR), 95% Confidence Intervals (CIs) and  $p$ -values, were calculated using MLwiN 3.05 software.

| Variable                                               | <i>H. capsulatum</i> seropositive (%), $n=104$ | Odds Ratio (95% Confidence Intervals) | $p$ -value |
|--------------------------------------------------------|------------------------------------------------|---------------------------------------|------------|
| <b>Rats observed around home in previous 12 months</b> |                                                |                                       |            |
| Reference category: No                                 | 4 (6.6)                                        | 1.00                                  |            |
| Yes                                                    | 100 (16.4)                                     | 3.03 (1.06-8.67)                      | 0.04*      |
| <b>Bats observed around home in previous 12 months</b> |                                                |                                       |            |
| Reference category: No                                 | 43 (13.4)                                      | 1.00                                  |            |
| Yes                                                    | 61 (17.5)                                      | 1.39 (0.89-2.16)                      | 0.14**     |
| <b>Mud walls</b>                                       |                                                |                                       |            |
| Reference category: No                                 | 4 (7.8)                                        | 1.00                                  |            |
| Yes                                                    | 100 (16.2)                                     | 2.67 (0.90-7.91)                      | 0.08**     |

| Age category, years |       |           |                  |       |
|---------------------|-------|-----------|------------------|-------|
|                     | 5-14  | 38 (14.0) | 1.74 (0.69-4.34) | 0.24  |
|                     | 15-24 | 27 (20.3) | 2.66 (1.03-6.89) | 0.04* |
| Reference category: | 25-34 | 6 (8.3)   | 1.00             |       |
|                     | 35-44 | 12 (15.8) | 2.13 (0.74-6.14) | 0.16  |
|                     | ≥45   | 21 (17.9) | 2.64 (0.99-7.01) | 0.05* |

257

258 \**p*-value <0.05 (statistically significant)

259 \*\**p*-value <0.1

260

261 The model yielded a Hosmer-Lemeshow chi-squared value of 2.091 (*p*=0.978). On delta beta

262 analysis, no data points were determined to be influential on the model outcome.

263 No evidence was demonstrated for clustering by household (variance=0.00, SE 0.00) on multi-level

264 analysis. Clustering by sub-location was demonstrated (variance=0.16, SE 0.17) although this

265 indicated that only 4.6% of variance in seropositivity is due to sub-location, using the latent-variable

266 approach. Regression coefficients, z-ratios and *p*-values, of model variables in single-, two- and

267 three-level models were comparable.

## 268 **Discussion**

269 The study describes the human seroprevalence of anti-*Histoplasma* antibody, and explores

270 associations between seropositivity and potential risk factors for *H. capsulatum* exposure in a

271 community and household setting, in Busia county, western Kenya.

272 The recent recognition of histoplasmosis as a priority disease in Kenya [1], and apparent

273 seroprevalence of *H. capsulatum* exposure demonstrated by survey respondents (*n*=104/670, 15.5%),

274 highlights the need for surveillance at national and regional levels. A previous histoplasmin skin test

275 survey in Kenya reported a positivity rate of 8.5% (*n*=65/768) in adult males [9]. The age distribution

276 of the study population was not reported, and participants were miners or prisoners from Lake Victoria

277 (western Kenya), and within or west of the Rift Valley, respectively. Skin test positivity is lower than

278 our apparent measured seroprevalence of 15.5% (*n*=104/670) which could be attributed to variable

279 environmental conditions influencing survival of the saprophytic mycelial form of *H. capsulatum*, or

280 variable exposure risk factors in the study populations under examination, including contact with

281 animal reservoirs. In addition, the study described employs a histoplasmin skin sensitivity test as

282 opposed to the LAT described in this study, which measure IgE-mediated reactions versus IgM  
283 agglutinating antibody responses, respectively.

284 With the exception of case reports [43–48], and limited prevalence studies in select socio-  
285 demographic groups [9,49,50], there is a paucity of recent epidemiologic data examining the burden  
286 of *H. capsulatum* exposure in the general population, and in variable community and household  
287 settings, in Kenya, the surrounding region, and more widely across sub-Saharan Africa. In Nigeria,  
288 two cross-sectional studies examining histoplasmin skin sensitivity across variable regions,  
289 demonstrated positive tests in 4.4% ( $n=32/735$ ) [8] and 10.5% ( $n=69/660$ ) [6] of participants. The  
290 latter study was conducted in proximity to a bat cave, and a sub-sample of this study population  
291 identified as farmers, cave guides and traders in the vicinity of the cave (35.0%,  $n=14/40$ ). Thus, the  
292 higher overall test positivity measured could be attributed to these study design factors.

293 Variables tested in the univariable and multivariable logistic regression models encompassed both  
294 established, and theoretically plausible, epidemiologic risk factors for *H. capsulatum* exposure. A  
295 significant association was identified between *H. capsulatum* seropositivity and the observation of rats  
296 within the household (OR=3.03 95% CI 1.06-8.67,  $p=0.04$ ). In Kenya, *H. capsulatum* has been  
297 isolated from soil, including samples enriched with chicken and bat faeces [51–53]. Although evidence  
298 exists for the role of rats as environmental reservoirs, current literature is limited to North America,  
299 where *H. capsulatum* was identified in wild rats, and soil samples proximal to rat burrows [26,54,55].  
300 Additional research is warranted in the community setting in western Kenya to explore any  
301 associations between *H. capsulatum* exposure and, the following variables: frequency and routes of  
302 human exposure to rats and their habitats, the location of rat burrows, isolation of *H. capsulatum* from  
303 rats and rat burrows, and the household and environmental factors maintaining rat populations.

304 The multivariable model presents associations ( $p<0.1$ ) between, *H. capsulatum* seropositivity and  
305 both, the observation of bats around the home, and housing constructed with mud. Bat habitat  
306 exposure has been reported as a risk factor for *H. capsulatum* exposure [22,23], and *H. capsulatum*  
307 has been isolated from bats using molecular techniques [29]. This model suggests that bat or rat  
308 contact might increase risk of *H. capsulatum* exposure. The purposeful selection of respondents  
309 reporting observation of bats around the home should be considered, which might increase overall  
310 seropositivity compared to a randomly selected sample. The difference between distributions of

311 respondents reporting observation of bats in the study sample, and in the original sub-set of  
312 respondents, was statistically significant. Further investigation is warranted to examine the role of  
313 rats, bats and environmental reservoirs of *H. capsulatum* within this context. In addition, studies  
314 employing molecular methods, may support current literature on phylogenetic characterisation of  
315 *Histoplasma* isolates, and comparison to regional and global isolates from human, animal and  
316 environmental sources [56–58].

317 Exploration of potential associations between building materials, and the isolation of *H. capsulatum* in  
318 the household environment is warranted. One might hypothesise that mud walls may provide better  
319 substrate to maintain the saprophytic mycelial form of *H. capsulatum*, in comparison to brick or  
320 cement. Furthermore, different building construction methods might present variable *H. capsulatum*  
321 exposure risks, for example construction of mud walls with handheld tools might increase exposure  
322 risk from soil. The variables presented may also be proxy indicators of socioeconomic factors that  
323 increase risk of *H. capsulatum* exposure, and could be indicative of the sociodemographic differences  
324 between regions, and availability of building materials.

325 The multivariable logistic regression model demonstrates increased odds of seropositivity amongst  
326 age categories 15-24 (OR=2.66 95% CI 1.03-6.89,  $p=0.04$ ) and  $\geq 45$  years (OR=2.64 95% CI 0.99-  
327 7.01,  $p=0.05$ ), in comparison to respondents aged 25-34 years. Investigation of whether the outcome  
328 reflects variable immunocompetence between age categories, or age-related exposure to potential  
329 risk factors, is warranted. The sub-set of household survey respondents under examination  
330 demonstrated a positively skewed age distribution. At the time of data collection, in 2010, the age  
331 group 0-14 years represented 43.4% of the general Kenyan population [59]. This proportion is  
332 comparable to that of the sample population, of which 40.6% of selected respondents were 5-14  
333 years ( $n=272/670$ ). Although representative of the general population, the effect of a skewed  
334 population structure on the frequency distribution of other variables under investigation, including  
335 reported occupations and involvement in animal contact roles, should be considered. For example,  
336 these variables may not be sufficiently powered to explore risk factors in older age categories. In  
337 comparison to studies exploring demographic or clinical risk factors for *H. capsulatum* infection in  
338 susceptible patient cohorts, the current study highlights potential environmental risk factors amongst  
339 the general population which may be confounded to a lesser extent by age.



340 Further targeted research is warranted to explore the impact of potential confounders such as age,  
341 gender and occupation. Investigation of associations between dwelling maintenance activities,  
342 building materials including mud walls, and presence of wild or domestic animals in occupied  
343 dwellings, would provide further objective insight into the interactions of described household and  
344 environmental variables, and their impact on *H. capsulatum* exposure risk.

345 Although the described associations do not infer direct causality, nor encompass the unknown  
346 lifestyle and socioeconomic confounding factors, the variables presented contribute to the complex  
347 epidemiological picture influencing *H. capsulatum* exposure status at the human-animal-environment  
348 interface in western Kenya.

349 There was no evidence for significant clustering at household- nor sub-location levels, however  
350 further investigation is warranted to identify the potential socio-demographic and geoclimatic  
351 variations between defined areas that have not been explored in this analysis, and to quantify their  
352 impact on the odds of seropositivity.

353 *H. capsulatum* was not a focus of the original PAZ study [35], thus questions posed by the survey  
354 were not designed to capture risk factors relating specifically to *H. capsulatum* exposure, nor to  
355 capture temporal information which might be related to the timing of exposure. Factors that contribute  
356 to whether inhalation of *H. capsulatum* microconidia results in symptomatic disease, include the  
357 quantity of airborne inoculum, and the immunocompetence of the host. A robust T cell response and  
358 subsequent activation of macrophages can prevent progression of *H. capsulatum* infection [60], in  
359 contrast to the progressive nature of infection in immunocompromised individuals [61–63], however it  
360 should be noted that infection can become clinically apparent many years after first exposure.

361 With the exception of data on respondent smoking behaviour (yes:  $n=17/670$ , 2.5% [seropositive:  
362  $n=4/17$ , 23.5%]) and HIV status (positive:  $n=48/670$ , 7.2% [seropositive:  $n=4$ , 8.3%]), clinical variables  
363 were excluded from analyses. The cross-sectional nature of data collection and absence of  
364 associated temporal data meant it was not possible to examine associations between reported clinical  
365 symptoms or disease and *H. capsulatum* seropositivity. Implementation of prospective, longitudinal  
366 research in community and household settings, would enable more accurate inferences to be made  
367 about associations between *H. capsulatum* seropositivity, and clinical signs or co-infections in the  
368 general population.

369 Hospital-based case series in Central and South America, have examined morbidity and mortality in  
370 HIV-positive patients with confirmed disseminated histoplasmosis [64–66], and histoplasmosis is now  
371 widely recognised as a leading co-morbidity amongst AIDS patients [16]. An overall HIV prevalence of  
372 7.7% of the general adult population was reported in Busia county in 2018 [67]. These individuals  
373 represent a potentially susceptible sub-set of the population to *H. capsulatum* co-infection. Clinical  
374 data with regards to individual immunocompetence of HIV-positive respondents at the time of survey  
375 delivery was not available, including access to and management of antiretroviral therapy. Among  
376 selected respondents, 48 (7.2%) demonstrated positive HIV status, however no statistically significant  
377 association was identified between HIV positive status and *H. capsulatum* seropositivity. An  
378 examination of the impact of HIV infection on immunodiffusion and complement fixation test results,  
379 revealed detection of anti-*Histoplasma* antibodies was significantly lower ( $p < 0.05$ ) in disseminated  
380 histoplasmosis cases with, as opposed to without, AIDS [68]. Thus, we speculate that measured  
381 seropositivity amongst HIV positive respondents in this study could be an underestimate due to the  
382 inability of these individuals to mount an immune response detectable by LAT. The effect of HIV co-  
383 infection on anti-*Histoplasma* antibody detection by LAT should be examined and quantified, to  
384 improve our understanding of test performance and limitations, and to increase the accuracy of  
385 seroprevalence estimates made on the basis of these test results. In addition, false positive results  
386 have been reported among patients with tuberculosis [69].

387 The possibility of cross-reactions with other systemic mycoses namely, *Aspergillus*, *Candida* and  
388 *Paracoccidioides* [70], should be acknowledged with the use of this LAT test. In the Kenyan context,  
389 *Aspergillus flavus* is documented as a major contaminant of maize crops, resulting in significant  
390 aflatoxin exposure [71]. Thus, the potential for cross-reactions with *Aspergillus*, specifically in a rural  
391 setting and in a maize-producing region, should be considered.

392 The LAT provides a measure of the presence of anti-*Histoplasma* antibody [38]. The IMMY® LA-  
393 *Histoplasma* test [38] references previously published overall sensitivity and specificity values [40].  
394 However, test sensitivity ranged from 45.7 to 100%, for cases of chronic and acute primary pulmonary  
395 histoplasmosis, respectively [40]. Thus, the estimated true seroprevalence measured in the current  
396 study might vary significantly from 12.9% (95% CI 10.2-16.0%) to 29.3% (95% CI 23.2-36.2%) [41].  
397 The samples were maintained temporarily at -20 degrees Celsius, prior to long term storage at -80

398 degrees Celsius. Freeze-thaw cycles were minimised and samples have not undergone any freeze-  
399 thaw cycles since 2016, thereby maintaining the integrity of samples for serological testing.

#### 400 **Conclusions**

401 Results from the current study suggest that exposure to *H. capsulatum* occurs frequently within this  
402 population, and promotes the need for further longitudinal research to investigate the incidence of *H.*  
403 *capsulatum* exposure and infection in Kenya. The seroprevalence reported here may provide a  
404 baseline for sample size approximations to support future epidemiologic studies of the burden of  
405 histoplasmosis.

406 Exploration of theoretically plausible risk factors has highlighted areas for further investigation. Future  
407 research might focus on further examination of the associations identified here, and consider how  
408 health, demographic, and socio-economic factors, impact on *H. capsulatum* transmission at the  
409 human-animal-environment interface.

#### 410 **Acknowledgements**

411 We thank the PAZ field and laboratory teams in Busia and Nairobi, Kenya, for their work in collecting  
412 the samples and metadata under analysis.

#### 413 **Funding**

414 The original samples described were collected with the support of the Wellcome Trust (085308) and  
415 the Medical Research Council award. This work received support from the CGIAR Research Program  
416 on Agriculture for Nutrition and Health (A4NH), led by the International Food Policy Research Institute  
417 (IFPRI). Laboratory processing and analyses presented here were supported by funds from  
418 Scantlebury Wellcome Trust ISSF Fellowship award. The funders had no role in this study design,  
419 analysis, manuscript preparation or decision to publish. We also acknowledge the CGIAR Fund  
420 Donors (<http://www.cgiar.org/about-us/our-funders>).

#### 421 **Availability of data**

422 The original dataset, and the serology results, are available via an open access repository held by the  
423 University of Liverpool (<http://dx.doi.org/10.17638/datacat.liverpool.ac.uk/352>).

424 **References**

- 425 1. Munyua P, Bitek A, Osoro E, Pieracci EG, Muema J, Mwatondo A, et al. Prioritization of  
426 Zoonotic Diseases in Kenya, 2015. PLoS One. 2016;11: e0161576.  
427 doi:10.1371/journal.pone.0161576
- 428 2. Kimanga D, Ogola S, Umuro M, Ng'ang'a A, Kimondo L, Murithi P, et al. Prevalence and  
429 incidence of HIV infection, trends, and risk factors among persons aged 15-64 years in Kenya:  
430 results from a nationally representative study. J Acquir Immune Defic Syndr. 2014;66 (Suppl.  
431 doi:10.1097/qai.000000000000124
- 432 3. Ball JD, Evans PR. Histoplasmin sensitivity in Uganda. Br Med J. 1954; 848–849.
- 433 4. Bezjak V. Histoplasmin tests in Ugandan sawmill workers. Trop Geogr Med. 1971;23: 71–78.
- 434 5. Gugnani H, Egere J, Larsh H. Skin sensitivity to capsulatum and duboisii histoplasmins in  
435 Nigeria. J Trop Med Hyg. 1991; 24–6.
- 436 6. Muotoe-Okafor FA, Gugnani HC, Gugnani A. Skin and serum reactivity among humans to  
437 histoplasmin in the vicinity of a natural focus of *Histoplasma capsulatum* var. *duboisii*.  
438 Mycopathologia. KluwerAcademic Publishers; 1996.
- 439 7. Muotoe-Okafor FA, Gugnani HC, Gugnani A, Okafor G. Antibodies to antigens of *Histoplasma*,  
440 *Blastomyces* and *Candida* in HIV patients and carriers in Nigeria. Mycoses. 2000;43: 173–175.  
441 doi:https://doi.org/10.1046/j.1439-0507.2000.00568.x
- 442 8. Oladele RO, Toriello C, Ogunsola FT, Ayanlowo OO, Foden P, Fayemiwo AS, et al. Prior  
443 subclinical histoplasmosis revealed in Nigeria using histoplasmin skin testing. 2018 [cited 6  
444 Aug 2021]. doi:10.1371/journal.pone.0196224
- 445 9. Stott H. Histoplasmin sensitivity and pulmonary calcification in Kenya. Br Med J. 1954; 22–25.
- 446 10. Lurie HI. Benign histoplasmosis: A preliminary report on the results of histoplasmin skin tests  
447 on residents of the Union of South Africa. South African Med J. 1949;23: 180–181.
- 448 11. Bezjak V, Farsey SJ. Prevalence of skin sensitivity to histoplasmin and coccidioidin in various  
449 Ugandan populations. Am J Trop Med Hyg. 1970;19: 664–669.
- 450 12. Oladele RO, Ayanlowo OO, Richardson MD, Denning DW. Histoplasmosis in Africa: An

- 451 emerging or a neglected disease? PLoS Negl Trop Dis. 2018;12.  
452 doi:10.1371/journal.pntd.0006046
- 453 13. Bongomin F, Kwizera R, Denning DW. Getting histoplasmosis on the map of international  
454 recommendations for patients with advanced hiv disease. J Fungi. 2019;5.  
455 doi:10.3390/jof5030080
- 456 14. Nacher M, Couppié P, Epelboin L, Djossou F, Demar M, Adenis A. Disseminated  
457 Histoplasmosis: Fighting a neglected killer of patients with advanced HIV disease in Latin  
458 America. PLOS Pathog. 2020;16: e1008449. doi:10.1371/journal.ppat.1008449
- 459 15. Adenis A, Nacher M, Hanf M, Vantilcke V, Boukhari R, Blachet D, et al. HIV-Associated  
460 Histoplasmosis Early Mortality and Incidence Trends: From Neglect to Priority. PLoS Negl  
461 Trop Dis. 2014;8. doi:10.1371/journal.pntd.0003100
- 462 16. Nacher M, Adenis A, Adriouch L, Dufour J, Papot E, Hanf M, et al. Short report: What is AIDS  
463 in the Amazon and the Guianas? Establishing the burden of disseminated histoplasmosis. Am  
464 J Trop Med Hyg. 2011;84: 239–240. doi:10.4269/ajtmh.2011.10-0251
- 465 17. Kauffman CA. Histoplasmosis: A clinical and laboratory update. Clinical Microbiology Reviews.  
466 2007. pp. 115–132. doi:10.1128/CMR.00027-06
- 467 18. Adenis AA, Aznar C, Couppié P. Histoplasmosis in HIV-Infected Patients: A Review of New  
468 Developments and Remaining Gaps. doi:10.1007/s40475-014-0017-8
- 469 19. Lin J-S, Yang C-W, Wang D-W, Wu-Hsieh BA. Dendritic Cells Cross-Present Exogenous  
470 Fungal Antigens to Stimulate a Protective CD8 T Cell Response in Infection by Histoplasma  
471 capsulatum. J Immunol. 2005;174: 6282–6291. doi:10.4049/jimmunol.174.10.6282
- 472 20. Armstrong PA, Beard JD, Bonilla L, Arboleda N, Lindsley MD, Chae SR, et al. Outbreak of  
473 Severe Histoplasmosis among Tunnel Workers - Dominican Republic, 2015. Clin Infect Dis.  
474 2018. doi:10.1093/cid/cix1067
- 475 21. Huhn GD, Austin C, Carr M, Heyer D, Boudreau P, Gilbert G, et al. Two outbreaks of  
476 occupationally acquired histoplasmosis: More than workers at risk. Environ Health Perspect.  
477 2005;113: 585–589. doi:10.1289/ehp.7484

- 478 22. Gutierrez RE, Warnock DW, Bravo A V, Corella A, Rodriguez I, Lindsley MD, et al.  
479 Histoplasmosis associated with exploring a bat-inhabited cave in Costa Rica, 1998-1999. *Am J*  
480 *Trop Med Hyg.* 2004;70: 438–442. doi:10.4269/ajtmh.2004.70.438
- 481 23. Salomon J, Flament Saillour M, De Truchis P, Bougnoux ME, Dromer F, Dupont B, et al. An  
482 Outbreak of Acute Pulmonary Histoplasmosis in Members of a Trekking Trip in Martinique,  
483 French West Indies. *J Travel Med.* 2003;10.
- 484 24. Brodsky AL, Gregg MB, Loewenstein MS, Leo Kaufman Md, Mallison GF, Atlanta M. Outbreak  
485 of Histoplasmosis Associated with the 1970 Earth Day Activities. *Am J Med.* 1973;54: 333–  
486 342.
- 487 25. Waldman RJ, England AC, Tauxe R, Kline T, Weeks RJ, Ajello L, et al. A winter outbreak of  
488 acute histoplasmosis in Northern Michigan. *Am J Epidemiol.* 1983;117: 68–75.  
489 doi:10.1093/oxfordjournals.aje.a113517
- 490 26. Emmons CW. Isolation of *Histoplasma capsulatum* from soil. *Public Health Rep.* 1949;64:  
491 892–896.
- 492 27. Gordon MA, Ajello L, Georg LK, Zeidberg LD. *Microsporium gypseum* and *Histoplasma*  
493 *capsulatum* Spores in Soil and Water. *Science* (80- ). 1952;116.
- 494 28. Emmons CW. Isolation of *Histoplasma capsulatum* From Soil in Washington, D.C. *Public*  
495 *Health Rep.* 1961;76: 591–595.
- 496 29. Dos Santos B, Langoni H, da Silva RC, Menozzi BD, Bosco S de MG, Paiz LM, et al.  
497 Molecular detection of *Histoplasma capsulatum* in insectivorous and frugivorous bats in  
498 Southeastern Brazil. *Med Mycol.* 2018;56: 937–940. doi:10.1093/mmy/myx138
- 499 30. Zeidberg LD, Ajello L. Environmental factors influencing the occurrence of *Histoplasma*  
500 *capsulatum* and *Microsporium gypseum* in soil. *J Bacteriol.* 1954;68: 156–159.
- 501 31. Zeidberg LD, Ajello L, Dillon A, Runyon LC. Isolation of *Histoplasma capsulatum* from Soil. *Am*  
502 *J Public Health.* 1952;42: 930–935.
- 503 32. Gugnani HC, Muotoe-Okafor FA, Kaufman L. A natural focus of *Histoplasma capsulatum* var.  
504 *duboisii* is a bat cave. *Mycopathologia.* Kluwer Academic Publishers; 1994.

- 505 33. McMurray DN, Russell LH. Contribution of bats to the maintenance of *Histoplasma capsulatum*  
506 in a cave microfocus. *Am J Trop Med Hyg.* 1982;31: 527–531.
- 507 34. Disalvo AF, Bigler WJ, Ajello L, Johnson J, Palmer J. Bat and Soil Studies for Sources of  
508 Histoplasmosis in Florida. *Public Heal Reports.* 2010;85: 1063. doi:10.2307/4594044
- 509 35. Fèvre EM, de Glanville WA, Thomas LF, Cook EAJ, Kariuki S, Wamae CN. An integrated  
510 study of human and animal infectious disease in the Lake Victoria crescent small-holder crop-  
511 livestock production system, Kenya. *BMC Infect Dis.* 2017;17: 1–14. doi:10.1186/s12879-017-  
512 2559-6
- 513 36. ILRI. People, animals and their zoonoses | International Livestock Research Institute. 2021  
514 [cited 9 Aug 2021]. Available: [https://www.ilri.org/research/projects/people-animals-and-their-](https://www.ilri.org/research/projects/people-animals-and-their-zoonoses)  
515 [zoonoses](https://www.ilri.org/research/projects/people-animals-and-their-zoonoses)
- 516 37. Thomas LF. Epidemiology of taenia solium Cysticercosis in western Kenya. University of  
517 Edinburgh. University of Edinburgh. 2014. Available: [https://www.lib.uwo.ca/cgi-](https://www.lib.uwo.ca/cgi-bin/ezpauthn.cgi?url=http://search.proquest.com/docview/1557570627?accountid=15115%0Ahttps://ocul-)  
518 [bin/ezpauthn.cgi?url=http://search.proquest.com/docview/1557570627?accountid=15115%0A](https://www.lib.uwo.ca/cgi-bin/ezpauthn.cgi?url=http://search.proquest.com/docview/1557570627?accountid=15115%0Ahttps://ocul-)  
519 <https://ocul->  
520 [uwo.primo.exlibrisgroup.com/openurl/01OCUL\\_UWO/01OCUL\\_UWO:UWO\\_DEFAULT??url\\_v](https://www.lib.uwo.ca/cgi-bin/ezpauthn.cgi?url=http://search.proquest.com/docview/1557570627?accountid=15115%0Ahttps://ocul-)  
521 [er=Z39.88-2004&rft\\_val\\_fmt=info:ofi/fmt:kev:mtx:dissertation](https://www.lib.uwo.ca/cgi-bin/ezpauthn.cgi?url=http://search.proquest.com/docview/1557570627?accountid=15115%0Ahttps://ocul-)
- 522 38. IMMY. LA-Coccidioides, LA-Histoplasma, and LA-Sporothrix Antibody Systems. 2018.  
523 Available: <https://www.immy.com/latex>
- 524 39. Chandler JW, Smith TK, Newberry WM, Chin TDY, Kirkpatrick CH. Immunology of the  
525 Mycoses. II. Characterization of the Immunoglobulin and Antibody Responses in  
526 Histoplasmosis. [cited 2 Aug 2022]. Available:  
527 <https://academic.oup.com/jid/article/119/3/247/2189101>
- 528 40. Hill GB, Campbell CC. Commercially available histoplasmin sensitized latex particles in an  
529 agglutination test for histoplasmosis. *Mycopathologia.* 1962;18: 169–176.
- 530 41. Epitools. Estimated true prevalence and predictive values from survey testing. 2021 [cited 19  
531 Aug 2021]. Available: <https://epitools.ausvet.com.au/trueprevalence>

- 532 42. Goldstein H, Browne W, Rasbash J. Partitioning Variation in Multilevel Models. *Underst Stat.*  
533 2002;1: 223–231.
- 534 43. Macharia A-M, Walong EO. Disseminated histoplasmosis in a paediatric patient at a referral  
535 hospital in Nairobi, Kenya. *Pan Afr Med J.* 2019;34: 139.  
536 doi:10.11604/pamj.2019.34.139.20685
- 537 44. Pamnani R. Disseminated histoplasmosis diagnosed on bone marrow aspirate cytology: report  
538 of four cases. *East Afr Med J.* 2009;86.
- 539 45. Shah M V, Ogada T, Nsanzumuhire H. Case report of *Histoplasma capsulatum* pulmonary  
540 histoplasmosis in a Kenyan African. *East Afr Med J.* 1978;55: 438–41.
- 541 46. McClatchie S, Kung'u A. Intestinal histoplasmosis in a Kenyan African. *East Afr Med J.*  
542 1969;46: 166–9.
- 543 47. Davies P. A fatal case of histoplasmosis contracted in Kenya. *East Afr Med J.* 1957;34: 555–7.
- 544 48. Gellert A. A case of histoplasmosis successfully treated with Amphotericin B. *East Afr Med J.*  
545 1960;37: 501–7.
- 546 49. Lofgren SM, Kirsch EJ, Maro VP, Morrissey AB, Msuya LJ, Kinabo GD, et al. Histoplasmosis  
547 among hospitalized febrile patients in northern Tanzania. *Trans R Soc Trop Med Hyg.*  
548 2012;106: 504–507. doi:10.1016/j.trstmh.2012.05.009
- 549 50. Bahr NC, Lee D, Stauffer WM, Durkin M, Cetron MS, Wheat LJ, et al. Seroprevalence of  
550 Histoplasmosis in Somali, Burmese, and Hmong Refugees Residing in Thailand and Kenya. *J*  
551 *Immigr Minor Heal.* 2018;20: 334–338. doi:10.1007/s10903-017-0595-3
- 552 51. Kipyegon KE, Musyoki SK, Kariuki SM. Detection of *Histoplasma Capsulatum* in Domestic  
553 Chicken Droppings in Olenguruone, Nakuru County. *Eur Sci Journal, ESJ.* 2017;13: 119.  
554 doi:10.19044/esj.2017.v13n15p119
- 555 52. Nyaga PN, Kaminjolo JS. Histoplasmosis in Kenya: isolation of *Histoplasma capsulatum* from  
556 cave soil. *Kenya Vet.* 1978;2: 39–41.
- 557 53. Al-Doory Y, Kalter SS. The isolation of *Histoplasma duboisii* and keratinophilic fungi from soils  
558 of East Africa. *Mycopathologia.* 1969;31.



- 559 54. Emmons CW, Ashburn LL. Histoplasmosis in Wild Rats: Occurrence and Histopathology.  
560 Public Health Rep. 1948;63: 1416–1422.
- 561 55. Emmons CW, Morlan HB, Hill EL. Histoplasmosis in Rats and Skunks in Georgia. Public  
562 Health Rep. 1949;64: 1423–1431.
- 563 56. Teixeira M de M, Patané JSL, Taylor ML, Gómez BL, Theodoro RC, de Hoog S, et al.  
564 Worldwide Phylogenetic Distributions and Population Dynamics of the Genus *Histoplasma*.  
565 PLoS Negl Trop Dis. 2016;10. doi:10.1371/journal.pntd.0004732
- 566 57. Sepúlveda VE, Márquez R, Turissini DA, Goldman WE, Matute DR. Genome Sequences  
567 Reveal Cryptic Speciation in the Human Pathogen *Histoplasma capsulatum*. MBio. 2017;8.  
568 doi:10.1128/mbio.01339-17
- 569 58. Kasuga T, Taylor JW, White TJ. Phylogenetic relationships of varieties and geographical  
570 groups of the human pathogenic fungus *Histoplasma capsulatum* darling. J Clin Microbiol.  
571 1999;37: 653–663.
- 572 59. World Bank. Kenya | Data. In: The World Bank Group [Internet]. 2021 [cited 27 Aug 2021].  
573 Available: <https://data.worldbank.org/country/kenya>
- 574 60. Newman SL. Cell-mediated immunity to *Histoplasma capsulatum*. Semin Respir Infect.  
575 2001;16: 102–8.
- 576 61. Evrard S, Caprasse P, Gavage P, Vasbien M, Radermacher J, Hayette MP, et al.  
577 Disseminated histoplasmosis: case report and review of the literature. Acta Clin Belgica Int J  
578 Clin Lab Med. 2018. doi:10.1080/17843286.2017.1376454
- 579 62. Tajañ J, Espasa M, Sala M, Navarro M, Font B, González-Martín J, et al. Case report:  
580 Disseminated infection by *Mycobacterium sherrisii* and *Histoplasma capsulatum* in an African  
581 HIV-infected patient. Am J Trop Med Hyg. 2013;88: 914–917. doi:10.4269/ajtmh.12-0572
- 582 63. Loulergue P, Bastides F, Baudouin V, Chandenier J, Mariani-Kurkdjian P, Dupont B, et al.  
583 Literature Review and Case Histories of *Histoplasma capsulatum* var. *duboisii* Infections in  
584 HIV-infected Patients. Emerg Infect Dis. 2007;13: 1647–1652.
- 585 64. Boigues BCS, Paniago AMM, Lima GME, Nunes M de O, Uehara SN de O. Clinical outcomes

- 586 and risk factors for death from disseminated histoplasmosis in patients with AIDS who visited a  
587 high-complexity hospital in campo Grande, MS, Brazil. *Rev Soc Bras Med Trop.* 2018.  
588 doi:10.1590/0037-8682-0369-2017
- 589 65. Ramos IC, Soares YC, Damasceno LS, Libório MP, Farias LABG, Heukelbach J, et al.  
590 Predictive factors for disseminated histoplasmosis in AIDS patients with fever admitted to a  
591 reference hospital in Brazil. *Rev Soc Bras Med Trop.* 2018;51: 479–84. doi:10.1590/0037-  
592 8682-0425-2017
- 593 66. Gutierrez ME, Canton A, Sosa N, Puga E, Talavera L. Disseminated Histoplasmosis in  
594 Patients with AIDS in Panama: A Review of 104 Cases. *Clin Infect Dis.* 2005;40: 1199–1202.  
595 doi:10.1086/428842
- 596 67. National Aids Control Council. Ministry of Health Kenya HIV Estimates Report 2018. 2018.  
597 Available: [www.nacc.or.ke](http://www.nacc.or.ke)
- 598 68. Tobón AM, Agudelo CA, Rosero DS, Ochoa JE, De Bedout C, Zuluaga A, et al. Disseminated  
599 Histoplasmosis: A comparative study between patients with Acquired Immunodeficiency  
600 Syndrome and non-Human Immunodeficiency Virus-infected individuals. *Am J Trop Med Hyg.*  
601 2018;73: 576–582. doi:10.4269/ajtmh.2005.73.576
- 602 69. Disalvo AF, Corbett DS. Apparent False Positive Histoplasmin Latex Agglutination Tests in  
603 Patients with Tuberculosis. *J Clin Microbiol.* 1976.
- 604 70. Oliveira dos Santos P, Messias Rodrigues A, Ferreira Fernandes G, Helena Marques da Silva  
605 S, Burger E, Pires de Camargo Z. Immunodiagnosis of Paracoccidioidomycosis due to  
606 *Paracoccidioides brasiliensis* Using a Latex Test: Detection of Specific Antibody Anti-gp43 and  
607 Specific Antigen gp43. *PLoS Negl Trop Dis.* 2015;9. doi:10.1371/journal.pntd.0003516
- 608 71. Islam MS, Callicott KA, Mutegi C, Bandyopadhyay R, Cotty PJ. *Aspergillus flavus* resident in  
609 Kenya: High genetic diversity in an ancient population primarily shaped by clonal reproduction  
610 and mutation-driven evolution. *Fungal Ecol.* 2018;35: 20–33.  
611 doi:10.1016/J.FUNECO.2018.05.012

612 **Supporting information**

613 **Table S1. Variables selected for data analysis, from original survey human and household**  
614 **survey reports.** <sup>1</sup>Analysis of observations of bats and wild birds only.

615 **Table S2. Original survey human and homestead report text, and re-coding of selected**  
616 **variables.** NR=not recorded; ND=not determined; NA=not applicable.

617 **Table S3. Re-categorised occupations for statistical analysis.**

618 **Table S4.** Univariable logistic regression analysis results, examining associations between *H.*  
619 *capsulatum* seropositivity based on LAT results, and respondent- and household-level  
620 variables, amongst survey respondents ( $n=670/942$ ) in Busia county, western Kenya. Odds  
621 Ratios (OR), 95% Confidence Intervals (CIs) and  $p$ -values, were calculated using IBM® SPSS®  
622 Statistics 25 software. \*  $p<0.05$ ; \*\*  $p<0.1$ .

623 **Table S5. Baseline characteristics of original sample ( $n=942$ ) and selected sub-set ( $n=670$ ) of**  
624 **survey respondents, and comparison of variable distribution differences using the Mann-**  
625 **Whitney U test.** \*  $p<0.05$ .

626 **Table S6.** The frequency distribution of IMMY® Latex Agglutination-*Histoplasma* test results  
627 for study respondents ( $n=670/942$ ), categorised by reaction strength, and result interpretation.

628 **Figure S1. Histogram demonstrating the frequency distribution of age categories (years) for**  
629 **study respondents.**

630 **Figure S2. IMMY® Latex Agglutination-*Histoplasma* test demonstrating positive control (left),**  
631 **negative control (centre), and serum sample yielding positive result with a reaction strength of**  
632 **2+ (right).**

- 1 **Figure 1. Study area in Busia county, western Kenya, and household locations ( $n=178$ ) within 102 sub-**
- 2 **locations. Key: red = households with  $\geq 1$  occupant seropositive for *H. capsulatum*; blue = households**
- 3 **with zero seropositive occupants. Maps generated using QGIS 3.12.2.**

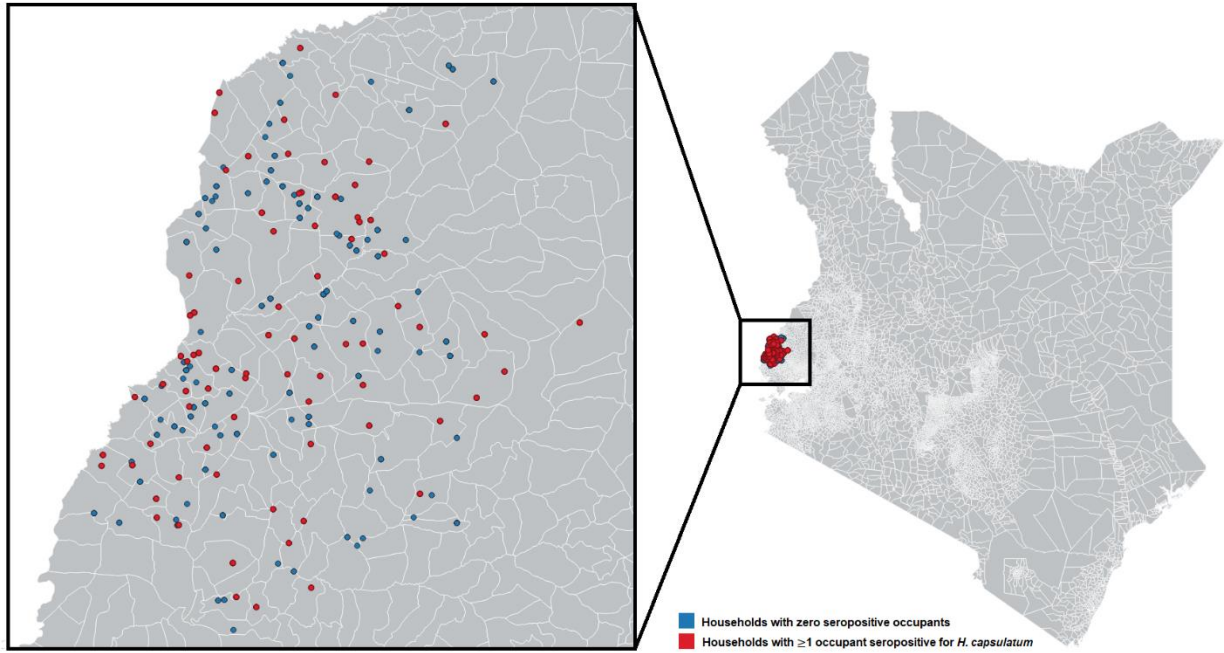

- 1 **Table 1. Selection of study respondents (n=670/942, 71.1%) from the household survey (Fèvre et al., 2017),**  
 2 **characterised by HIV status (Positive/ Negative), and bat observation around the home in previous 12 months (Yes/**  
 3 **No).**

|            |          | Bats observed around home in previous 12 months |     | Total |
|------------|----------|-------------------------------------------------|-----|-------|
|            |          | No*                                             | Yes |       |
| HIV result | Negative | 292                                             | 330 | 622   |
|            | Positive | 30                                              | 18  | 48    |
| Total      |          | 322                                             | 348 | 670   |

- 4 \* No (n=321) or not answered (n=1)

- 1 **Table 2. Multivariable logistic regression analysis examining variable associations with *H. capsulatum* seropositivity**  
 2 **based on LAT results, amongst survey respondents ( $n=670/942$ , 71.1%) in Busia county, western Kenya. Odds Ratios**  
 3 **(OR), 95% Confidence Intervals (CIs) and  $p$ -values, were calculated using MLwiN 3.05 software.**

| Variable                                               | <i>H. capsulatum</i> seropositive (%), $n=104$ | Odds Ratio (95% Confidence Intervals) | $p$ -value |
|--------------------------------------------------------|------------------------------------------------|---------------------------------------|------------|
| <b>Rats observed around home in previous 12 months</b> |                                                |                                       |            |
| Reference category: No                                 | 4 (6.6)                                        | 1.00                                  |            |
| Yes                                                    | 100 (16.4)                                     | 3.03 (1.06-8.67)                      | 0.04*      |
| <b>Bats observed around home in previous 12 months</b> |                                                |                                       |            |
| Reference category: No                                 | 43 (13.4)                                      | 1.00                                  |            |
| Yes                                                    | 61 (17.5)                                      | 1.39 (0.89-2.16)                      | 0.14**     |
| <b>Mud walls</b>                                       |                                                |                                       |            |
| Reference category: No                                 | 4 (7.8)                                        | 1.00                                  |            |
| Yes                                                    | 100 (16.2)                                     | 2.67 (0.90-7.91)                      | 0.08**     |
| <b>Age category, years</b>                             |                                                |                                       |            |
| 5-14                                                   | 38 (14.0)                                      | 1.74 (0.69-4.34)                      | 0.24       |
| 15-24                                                  | 27 (20.3)                                      | 2.66 (1.03-6.89)                      | 0.04*      |
| Reference category: 25-34                              | 6 (8.3)                                        | 1.00                                  |            |
| 35-44                                                  | 12 (15.8)                                      | 2.13 (0.74-6.14)                      | 0.16       |
| ≥45                                                    | 21 (17.9)                                      | 2.64 (0.99-7.01)                      | 0.05*      |

4

5 \* $p$ -value <0.05 (statistically significant)6 \*\* $p$ -value <0.1

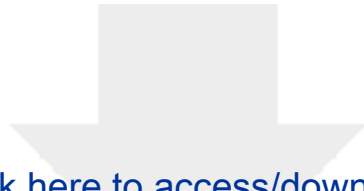

[Click here to access/download](#)

**Supporting Information**

T Cornell et al\_Kenya metadata analysis\_Fig S1.pdf

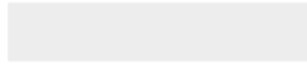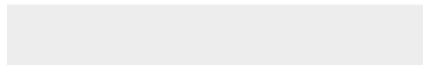



[Click here to access/download](#)

**Supporting Information**

T Cornell et al\_Kenya metadata analysis\_Fig S2.pdf

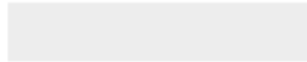



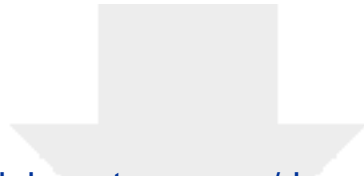

[Click here to access/download](#)

**Supporting Information**

[T Cornell et al\\_Kenya metadata analys\\_Table S1.pdf](#)

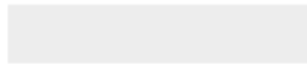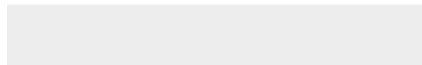



[Click here to access/download](#)

**Supporting Information**

[T Cornell et al\\_Kenya metadata analys\\_Table S2.pdf](#)





[Click here to access/download](#)

**Supporting Information**

T Cornell et al\_Kenya metadata analys\_Table S3.pdf





[Click here to access/download](#)

**Supporting Information**

[T Cornell et al\\_Kenya metadata analys\\_Table S4.pdf](#)

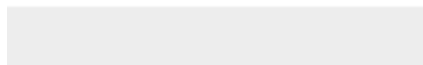



[Click here to access/download](#)

**Supporting Information**

[T Cornell et al\\_Kenya metadata analys\\_Table S5.pdf](#)



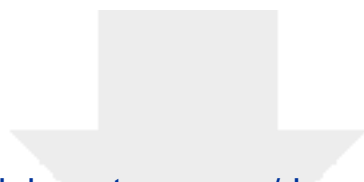

[Click here to access/download](#)

**Supporting Information**

[T Cornell et al\\_Kenya metadata analys\\_Table S6.pdf](#)

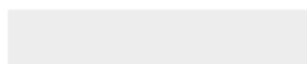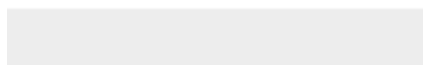

Supplement: pntd.0011295.s007.pdf [file pntd.0011295.s007.pdf]
